# Supplementary figures and images for: Single item measures of self-rated mental health: a scoping review
Source: Springer Nature journal article supplement (doi:10.1186/1472-6963-14-398), 2014-09-17

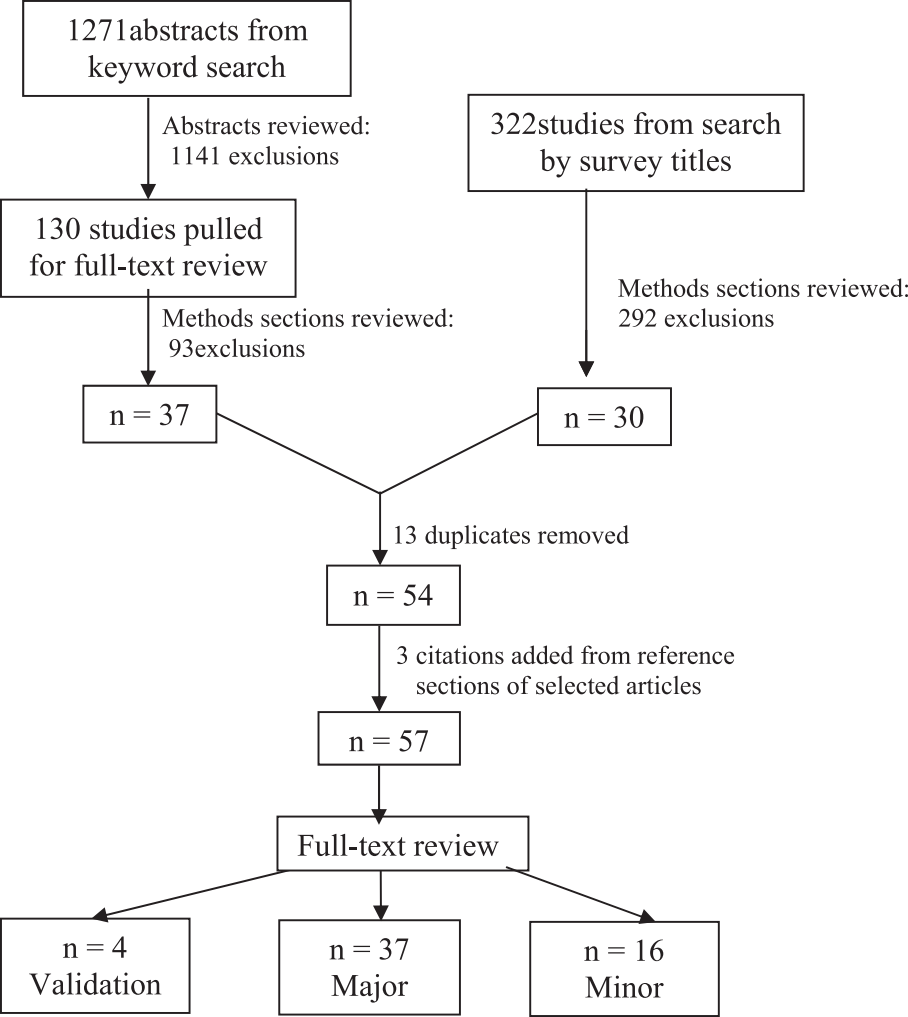

Supplement: 12913_2014_3498_MOESM2_ESM.pdf [file 12913_2014_3498_MOESM2_ESM.pdf]
